# Supplementary material for: Transcriptomic analysis of thermotolerant yeastKluyveromyces marxianusin multiple inhibitors tolerance
Source: Royal Society of Chemistry journal article supplement (doi:10.1039/c8ra00335a), 2018-01-01
Supplement: c8ra00335a1.pdf [file c8ra00335a1.pdf]

## Electronic Supplementary Information

Transcriptomic analysis of thermotolerant yeast *Kluyveromyces marxianus* in multiple  
inhibitors tolerance

Dongmei Wang, Dan Wu, Xiaoxue Yang, Jiong Hong \*

**Affiliation:**

School of Life Sciences, University of Science and Technology of China, Hefei,  
Anhui, 230027, P. R. China

\* Corresponding author.

Tel.: +86 551 63600705; Fax: +86 551 63601443;

E-mail address: [hjiong@ustc.edu.cn](mailto:hjiong@ustc.edu.cn)

**Table S1 Summary of mapping results from RNA-seq of *K. marxianus***

| Sample | Clean reads | Clean base<br>(bp) | > Q20 (%) | > Q30 (%) | GC<br>(%) | Uniquely<br>Mapping<br>reads | Mapping<br>rate (%) |
|--------|-------------|--------------------|-----------|-----------|-----------|------------------------------|---------------------|
| I      | 13,622,794  | 2.44E+09           | 97.68     | 92.79     | 44.57     | 12,490,287                   | 91.69               |
| C      | 17,697,296  | 1.89E+09           | 97.31     | 91.87     | 46.27     | 16,279,803                   | 91.99               |

Note: I and C represent samples of yeast grown on medium with or without multiple fermentation inhibitors in YPD under aerobic condition. Q20, Q30 refer to the proportion of base calls with Phred scores >20 or 30 in the total bases.

**Table S2 Summary of differentially expressed genes involved in GO enrichments in multiple inhibitors treated condition.**

| ID         | Description                                              | DEGs in study | Background | Ratio in background | Number up | Number down |
|------------|----------------------------------------------------------|---------------|------------|---------------------|-----------|-------------|
| GO:0006096 | glycolytic process                                       | 16            | 26         | 0.62                | 2         | 14          |
| GO:0032787 | monocarboxylic acid metabolic process                    | 40            | 90         | 0.44                | 13        | 27          |
| GO:0006090 | pyruvate metabolic process                               | 22            | 42         | 0.52                | 6         | 16          |
| GO:0006094 | gluconeogenesis                                          | 17            | 31         | 0.55                | 3         | 14          |
| GO:0006091 | generation of precursor metabolites and energy           | 27            | 71         | 0.38                | 11        | 16          |
| GO:0055114 | oxidation-reduction process                              | 69            | 304        | 0.23                | 33        | 36          |
| GO:0016491 | oxidoreductase activity                                  | 65            | 286        | 0.23                | 36        | 29          |
| GO:0043436 | oxoacid metabolic process                                | 77            | 394        | 0.20                | 26        | 51          |
| GO:0006082 | organic acid metabolic process                           | 77            | 395        | 0.19                | 26        | 51          |
| GO:0019319 | hexose biosynthetic process                              | 17            | 32         | 0.53                | 3         | 14          |
| GO:0046364 | monosaccharide biosynthetic process                      | 17            | 32         | 0.53                | 3         | 14          |
| GO:0044281 | small molecule metabolic process                         | 115           | 689        | 0.17                | 42        | 73          |
| GO:0019752 | carboxylic acid metabolic process                        | 77            | 393        | 0.20                | 26        | 51          |
| GO:0044763 | single-organism cellular process                         | 184           | 1329       | 0.14                | 89        | 95          |
| GO:0044710 | single-organism metabolic process                        | 171           | 1138       | 0.15                | 80        | 91          |
| GO:0006099 | tricarboxylic acid cycle                                 | 16            | 29         | 0.55                | 16        | 0           |
| GO:0044699 | single-organism process                                  | 220           | 1602       | 0.14                | 113       | 107         |
| GO:0044711 | single-organism biosynthetic process                     | 64            | 344        | 0.19                | 12        | 52          |
| GO:0006006 | glucose metabolic process                                | 18            | 43         | 0.42                | 3         | 15          |
| GO:0003824 | catalytic activity                                       | 212           | 1754       | 0.12                | 112       | 100         |
| GO:1901564 | organonitrogen compound metabolic process                | 98            | 641        | 0.15                | 34        | 64          |
| GO:0016051 | carbohydrate biosynthetic process                        | 18            | 47         | 0.38                | 3         | 15          |
| GO:0044724 | single-organism carbohydrate catabolic process           | 17            | 43         | 0.40                | 2         | 15          |
| GO:0016614 | oxidoreductase activity, acting on CH-OH group of donors | 18            | 51         | 0.35                | 9         | 9           |

|            |                                                                                       |     |      |      |     |     |
|------------|---------------------------------------------------------------------------------------|-----|------|------|-----|-----|
| GO:0016052 | carbohydrate catabolic process                                                        | 17  | 47   | 0.36 | 2   | 15  |
| GO:0019318 | hexose metabolic process                                                              | 19  | 58   | 0.33 | 4   | 15  |
| GO:0016616 | oxidoreductase activity, acting on the CH-OH group of donors, NAD or NADP as acceptor | 17  | 48   | 0.35 | 8   | 9   |
| GO:0005996 | monosaccharide metabolic process                                                      | 19  | 60   | 0.32 | 4   | 15  |
| GO:0008152 | metabolic process                                                                     | 243 | 2176 | 0.11 | 126 | 117 |
| GO:0044262 | cellular carbohydrate metabolic process                                               | 17  | 50   | 0.34 | 7   | 10  |
| GO:0055085 | transmembrane transport                                                               | 49  | 269  | 0.18 | 35  | 14  |
| GO:0048037 | cofactor binding                                                                      | 31  | 138  | 0.22 | 16  | 15  |
| GO:0009987 | cellular process                                                                      | 230 | 2047 | 0.11 | 118 | 112 |
| GO:1990204 | oxidoreductase complex                                                                | 10  | 20   | 0.50 | 10  | 0   |
| GO:0051186 | cofactor metabolic process                                                            | 27  | 118  | 0.23 | 7   | 20  |
| GO:0015976 | carbon utilization                                                                    | 8   | 13   | 0.62 | 4   | 4   |
| GO:0046487 | glyoxylate metabolic process                                                          | 8   | 13   | 0.62 | 6   | 2   |
| GO:0005975 | carbohydrate metabolic process                                                        | 35  | 178  | 0.20 | 14  | 21  |
| GO:1901576 | organic substance biosynthetic process                                                | 84  | 599  | 0.14 | 18  | 66  |
| GO:0044712 | single-organism catabolic process                                                     | 39  | 214  | 0.18 | 11  | 28  |
| GO:0009058 | biosynthetic process                                                                  | 86  | 626  | 0.14 | 19  | 67  |
| GO:0006732 | coenzyme metabolic process                                                            | 22  | 93   | 0.24 | 5   | 17  |
| GO:0044723 | single-organism carbohydrate metabolic process                                        | 27  | 128  | 0.21 | 9   | 18  |
| GO:0003674 | molecular_function                                                                    | 291 | 2817 | 0.10 | 166 | 125 |
| GO:0044237 | cellular metabolic process                                                            | 181 | 1595 | 0.11 | 82  | 99  |
| GO:1901566 | organonitrogen compound biosynthetic process                                          | 39  | 223  | 0.17 | 8   | 31  |
| GO:0051287 | NAD binding                                                                           | 9   | 21   | 0.43 | 4   | 5   |
| GO:0006081 | cellular aldehyde metabolic process                                                   | 9   | 21   | 0.43 | 6   | 3   |
| GO:1901070 | guanosine-containing compound biosynthetic process                                    | 4   | 4    | 1.00 | 1   | 3   |
| GO:0008150 | biological_process                                                                    | 314 | 3115 | 0.10 | 180 | 134 |
| GO:0044283 | small molecule biosynthetic process                                                   | 33  | 185  | 0.18 | 5   | 28  |

|            |                                                                                              |     |      |      |    |     |
|------------|----------------------------------------------------------------------------------------------|-----|------|------|----|-----|
| GO:0050662 | coenzyme binding                                                                             | 20  | 91   | 0.22 | 10 | 10  |
| GO:0071704 | organic substance metabolic process                                                          | 186 | 1677 | 0.11 | 81 | 105 |
| GO:0006740 | NADPH regeneration                                                                           | 8   | 19   | 0.42 | 1  | 7   |
| GO:0006007 | glucose catabolic process                                                                    | 8   | 19   | 0.42 | 1  | 7   |
| GO:0019320 | hexose catabolic process                                                                     | 8   | 19   | 0.42 | 1  | 7   |
| GO:0006098 | pentose-phosphate shunt                                                                      | 8   | 19   | 0.42 | 1  | 7   |
| GO:0006753 | nucleoside phosphate metabolic process                                                       | 37  | 222  | 0.17 | 14 | 23  |
| GO:0005985 | sucrose metabolic process                                                                    | 7   | 15   | 0.47 | 3  | 4   |
| GO:0005982 | starch metabolic process                                                                     | 7   | 15   | 0.47 | 3  | 4   |
| GO:0043169 | cation binding                                                                               | 73  | 543  | 0.13 | 41 | 32  |
| GO:0043167 | ion binding                                                                                  | 132 | 1127 | 0.12 | 73 | 59  |
| GO:0009117 | nucleotide metabolic process                                                                 | 36  | 218  | 0.17 | 13 | 23  |
| GO:0046872 | metal ion binding                                                                            | 72  | 539  | 0.13 | 40 | 32  |
| GO:0006000 | fructose metabolic process                                                                   | 7   | 16   | 0.44 | 2  | 5   |
| GO:0006013 | mannose metabolic process                                                                    | 7   | 16   | 0.44 | 2  | 5   |
| GO:0006739 | NADP metabolic process                                                                       | 8   | 21   | 0.38 | 1  | 7   |
| GO:0046365 | monosaccharide catabolic process                                                             | 8   | 21   | 0.38 | 1  | 7   |
| GO:0009152 | purine ribonucleotide biosynthetic process                                                   | 10  | 32   | 0.31 | 3  | 7   |
| GO:0006164 | purine nucleotide biosynthetic process                                                       | 10  | 32   | 0.31 | 3  | 7   |
| GO:0046496 | nicotinamide nucleotide metabolic process                                                    | 9   | 27   | 0.33 | 2  | 7   |
| GO:0005984 | disaccharide metabolic process                                                               | 7   | 17   | 0.41 | 3  | 4   |
| GO:0009063 | cellular amino acid catabolic process                                                        | 8   | 22   | 0.36 | 3  | 5   |
| GO:0009260 | ribonucleotide biosynthetic process                                                          | 11  | 40   | 0.28 | 3  | 8   |
| GO:0046912 | transferase activity, transferring acyl groups, acyl groups converted into alkyl on transfer | 5   | 9    | 0.56 | 2  | 3   |
| GO:0006790 | sulfur compound metabolic process                                                            | 15  | 67   | 0.22 | 3  | 12  |
| GO:0009168 | purine ribonucleoside monophosphate biosynthetic process                                     | 9   | 29   | 0.31 | 2  | 7   |
| GO:0009127 | purine nucleoside monophosphate biosynthetic process                                         | 9   | 29   | 0.31 | 2  | 7   |

|            |                                                                            |    |     |      |    |    |
|------------|----------------------------------------------------------------------------|----|-----|------|----|----|
| GO:0000287 | magnesium ion binding                                                      | 11 | 41  | 0.27 | 3  | 8  |
| GO:0046390 | ribose phosphate biosynthetic process                                      | 11 | 41  | 0.27 | 3  | 8  |
| GO:0046037 | GMP metabolic process                                                      | 3  | 3   | 1.00 | 0  | 3  |
| GO:0004365 | glyceraldehyde-3-phosphate dehydrogenase (NAD+) (phosphorylating) activity | 3  | 3   | 1.00 | 1  | 2  |
| GO:0006177 | GMP biosynthetic process                                                   | 3  | 3   | 1.00 | 0  | 3  |
| GO:0046395 | carboxylic acid catabolic process                                          | 8  | 24  | 0.33 | 3  | 5  |
| GO:0016054 | organic acid catabolic process                                             | 8  | 24  | 0.33 | 3  | 5  |
| GO:0072522 | purine-containing compound biosynthetic process                            | 10 | 36  | 0.28 | 3  | 7  |
| GO:0006144 | purine nucleobase metabolic process                                        | 16 | 77  | 0.21 | 4  | 12 |
| GO:0006733 | oxidoreduction coenzyme metabolic process                                  | 10 | 37  | 0.27 | 2  | 8  |
| GO:0019362 | pyridine nucleotide metabolic process                                      | 9  | 31  | 0.29 | 2  | 7  |
| GO:0055086 | nucleobase-containing small molecule metabolic process                     | 41 | 281 | 0.15 | 16 | 25 |
| GO:0006073 | cellular glucan metabolic process                                          | 7  | 20  | 0.35 | 3  | 4  |
| GO:1901606 | alpha-amino acid catabolic process                                         | 7  | 20  | 0.35 | 3  | 4  |
| GO:0009311 | oligosaccharide metabolic process                                          | 7  | 20  | 0.35 | 3  | 4  |
| GO:0044042 | glucan metabolic process                                                   | 7  | 20  | 0.35 | 3  | 4  |
| GO:0072524 | pyridine-containing compound metabolic process                             | 10 | 38  | 0.26 | 2  | 8  |
| GO:0005829 | cytosol                                                                    | 8  | 26  | 0.31 | 4  | 4  |
| GO:0009167 | purine ribonucleoside monophosphate metabolic process                      | 21 | 117 | 0.18 | 10 | 11 |
| GO:0009126 | purine nucleoside monophosphate metabolic process                          | 21 | 117 | 0.18 | 10 | 11 |
| GO:0008483 | transaminase activity                                                      | 7  | 21  | 0.33 | 3  | 4  |
| GO:0044264 | cellular polysaccharide metabolic process                                  | 7  | 21  | 0.33 | 3  | 4  |
| GO:0005976 | polysaccharide metabolic process                                           | 7  | 21  | 0.33 | 3  | 4  |

|            |                                                             |     |      |      |    |    |
|------------|-------------------------------------------------------------|-----|------|------|----|----|
| GO:0016769 | transferase activity,<br>transferring nitrogenous<br>groups | 7   | 21   | 0.33 | 3  | 4  |
| GO:0044765 | single-organism transport                                   | 53  | 394  | 0.13 | 37 | 16 |
| GO:0045275 | respiratory chain complex<br>III                            | 4   | 7    | 0.57 | 3  | 0  |
| GO:0006553 | lysine metabolic process                                    | 6   | 16   | 0.38 | 2  | 4  |
| GO:0072330 | monocarboxylic acid<br>biosynthetic process                 | 8   | 27   | 0.30 | 1  | 7  |
| GO:0051188 | cofactor biosynthetic<br>process                            | 14  | 67   | 0.21 | 5  | 9  |
| GO:0046394 | carboxylic acid biosynthetic<br>process                     | 25  | 151  | 0.17 | 4  | 21 |
| GO:0016053 | organic acid biosynthetic<br>process                        | 25  | 151  | 0.17 | 4  | 21 |
| GO:0009156 | ribonucleoside<br>monophosphate biosynthetic<br>process     | 10  | 40   | 0.25 | 2  | 8  |
| GO:0044238 | primary metabolic process<br>ribonucleoside                 | 171 | 1604 | 0.11 | 79 | 92 |
| GO:0009161 | monophosphate metabolic<br>process                          | 22  | 128  | 0.17 | 10 | 12 |
| GO:0006520 | cellular amino acid<br>metabolic process                    | 45  | 325  | 0.14 | 14 | 31 |
| GO:0009123 | nucleoside monophosphate<br>metabolic process               | 22  | 130  | 0.17 | 10 | 12 |
| GO:0004022 | alcohol dehydrogenase<br>(NAD) activity                     | 3   | 4    | 0.75 | 2  | 1  |
| GO:1901659 | glycosyl compound<br>biosynthetic process                   | 9   | 35   | 0.26 | 3  | 6  |
| GO:0009081 | branched-chain amino acid<br>metabolic process              | 7   | 23   | 0.30 | 0  | 7  |
| GO:0044282 | small molecule catabolic<br>process                         | 8   | 29   | 0.28 | 3  | 5  |
| GO:0070013 | intracellular organelle lumen                               | 8   | 29   | 0.28 | 8  | 0  |
| GO:0043233 | organelle lumen                                             | 8   | 29   | 0.28 | 8  | 0  |
| GO:0019637 | organophosphate metabolic<br>process                        | 41  | 294  | 0.14 | 15 | 26 |
| GO:0009124 | nucleoside monophosphate<br>biosynthetic process            | 10  | 42   | 0.24 | 2  | 8  |
| GO:0009066 | aspartate family amino acid<br>metabolic process            | 15  | 77   | 0.19 | 3  | 12 |
| GO:0006119 | oxidative phosphorylation                                   | 6   | 18   | 0.33 | 5  | 1  |
| GO:0016209 | antioxidant activity                                        | 6   | 18   | 0.33 | 4  | 2  |

|            |                                                 |    |     |      |    |    |
|------------|-------------------------------------------------|----|-----|------|----|----|
| GO:0051539 | 4 iron, 4 sulfur cluster binding                | 5  | 13  | 0.38 | 3  | 2  |
| GO:0016021 | integral component of membrane                  | 60 | 479 | 0.13 | 41 | 19 |
| GO:0044425 | membrane part                                   | 74 | 617 | 0.12 | 51 | 23 |
| GO:0006793 | phosphorus metabolic process                    | 61 | 487 | 0.13 | 24 | 37 |
| GO:0009112 | nucleobase metabolic process                    | 17 | 93  | 0.18 | 4  | 13 |
| GO:0046129 | purine ribonucleoside biosynthetic process      | 7  | 25  | 0.28 | 3  | 4  |
| GO:0042451 | purine nucleoside biosynthetic process          | 7  | 25  | 0.28 | 3  | 4  |
| GO:0031974 | membrane-enclosed lumen                         | 9  | 38  | 0.24 | 9  | 0  |
| GO:1901362 | organic cyclic compound biosynthetic process    | 34 | 240 | 0.14 | 9  | 25 |
| GO:0034614 | cellular response to reactive oxygen species    | 4  | 9   | 0.44 | 2  | 2  |
| GO:0022857 | transmembrane transporter activity              | 28 | 188 | 0.15 | 19 | 9  |
| GO:0020037 | heme binding                                    | 8  | 32  | 0.25 | 1  | 7  |
| GO:0046906 | tetrapyrrole binding                            | 8  | 32  | 0.25 | 1  | 7  |
| GO:0009163 | nucleoside biosynthetic process                 | 8  | 32  | 0.25 | 3  | 5  |
| GO:0042455 | ribonucleoside biosynthetic process             | 8  | 32  | 0.25 | 3  | 5  |
| GO:0009056 | catabolic process                               | 42 | 315 | 0.13 | 13 | 29 |
| GO:0043604 | amide biosynthetic process                      | 7  | 26  | 0.27 | 1  | 6  |
| GO:0005215 | transporter activity                            | 33 | 232 | 0.14 | 23 | 10 |
| GO:0042723 | thiamine-containing compound metabolic process  | 3  | 5   | 0.60 | 0  | 3  |
| GO:1990351 | transporter complex                             | 3  | 5   | 0.60 | 3  | 0  |
| GO:0030976 | thiamine pyrophosphate binding                  | 3  | 5   | 0.60 | 2  | 1  |
| GO:0006772 | thiamine metabolic process                      | 3  | 5   | 0.60 | 0  | 3  |
| GO:0070469 | respiratory chain                               | 3  | 5   | 0.60 | 3  | 0  |
| GO:1902495 | transmembrane transporter complex               | 3  | 5   | 0.60 | 3  | 0  |
| GO:0044249 | cellular biosynthetic process                   | 69 | 573 | 0.12 | 15 | 54 |
| GO:0016836 | hydro-lyase activity                            | 6  | 20  | 0.30 | 4  | 2  |
| GO:0006796 | phosphate-containing compound metabolic process | 59 | 479 | 0.12 | 23 | 36 |



|            |                                                                             |    |     |      |    |    |
|------------|-----------------------------------------------------------------------------|----|-----|------|----|----|
| GO:1901605 | alpha-amino acid metabolic process                                          | 39 | 289 | 0.13 | 11 | 28 |
| GO:0006066 | alcohol metabolic process                                                   | 7  | 27  | 0.26 | 0  | 7  |
| GO:0009108 | coenzyme biosynthetic process                                               | 11 | 55  | 0.20 | 3  | 8  |
| GO:0004449 | isocitrate dehydrogenase (NAD+) activity                                    | 2  | 2   | 1.00 | 2  | 0  |
| GO:0003872 | 6-phosphofructokinase activity                                              | 2  | 2   | 1.00 | 0  | 2  |
| GO:0006002 | fructose 6-phosphate metabolic process                                      | 2  | 2   | 1.00 | 0  | 2  |
| GO:0016801 | hydrolase activity, acting on ether bonds                                   | 2  | 2   | 1.00 | 0  | 2  |
| GO:0016805 | dipeptidase activity                                                        | 2  | 2   | 1.00 | 0  | 2  |
| GO:0070283 | radical SAM enzyme activity                                                 | 2  | 2   | 1.00 | 1  | 1  |
| GO:1903289 | regulation of ATP catabolic process                                         | 2  | 2   | 1.00 | 2  | 0  |
| GO:0004410 | homocitrate synthase activity                                               | 2  | 2   | 1.00 | 0  | 2  |
| GO:0043171 | peptide catabolic process                                                   | 2  | 2   | 1.00 | 0  | 2  |
| GO:0006510 | ATP-dependent proteolysis                                                   | 2  | 2   | 1.00 | 2  | 0  |
| GO:0004176 | ATP-dependent peptidase activity                                            | 2  | 2   | 1.00 | 2  | 0  |
| GO:0004347 | glucose-6-phosphate isomerase activity                                      | 2  | 2   | 1.00 | 0  | 2  |
| GO:0032781 | positive regulation of ATPase activity                                      | 2  | 2   | 1.00 | 2  | 0  |
| GO:0003938 | IMP dehydrogenase activity                                                  | 2  | 2   | 1.00 | 0  | 2  |
| GO:0001671 | ATPase activator activity                                                   | 2  | 2   | 1.00 | 2  | 0  |
| GO:0043462 | regulation of ATPase activity                                               | 2  | 2   | 1.00 | 2  | 0  |
| GO:0005945 | 6-phosphofructokinase complex                                               | 2  | 2   | 1.00 | 0  | 2  |
| GO:0006633 | fatty acid biosynthetic process                                             | 6  | 21  | 0.29 | 1  | 5  |
| GO:0016765 | transferase activity, transferring alkyl or aryl (other than methyl) groups | 6  | 21  | 0.29 | 1  | 5  |
| GO:0044445 | cytosolic part                                                              | 6  | 21  | 0.29 | 0  | 6  |
| GO:1901615 | organic hydroxy compound metabolic process                                  | 8  | 34  | 0.24 | 0  | 8  |
| GO:0009110 | vitamin biosynthetic process                                                | 9  | 41  | 0.22 | 1  | 8  |
| GO:0042364 | water-soluble vitamin                                                       | 9  | 41  | 0.22 | 1  | 8  |

|            |                                                                              |    |     |      |    |    |
|------------|------------------------------------------------------------------------------|----|-----|------|----|----|
|            | biosynthetic process                                                         |    |     |      |    |    |
| GO:0030170 | pyridoxal phosphate binding                                                  | 9  | 41  | 0.22 | 4  | 5  |
| GO:0072593 | reactive oxygen species<br>metabolic process                                 | 4  | 10  | 0.40 | 2  | 2  |
| GO:0008299 | isoprenoid biosynthetic<br>process                                           | 4  | 10  | 0.40 | 0  | 4  |
| GO:0000302 | response to reactive oxygen<br>species                                       | 4  | 10  | 0.40 | 2  | 2  |
| GO:1901701 | cellular response to oxygen-<br>containing compound                          | 4  | 10  | 0.40 | 2  | 2  |
| GO:0006720 | isoprenoid metabolic<br>process                                              | 4  | 10  | 0.40 | 0  | 4  |
| GO:0016684 | oxidoreductase activity,<br>acting on peroxide as<br>acceptor                | 4  | 10  | 0.40 | 2  | 2  |
| GO:0019751 | polyol metabolic process                                                     | 4  | 10  | 0.40 | 0  | 4  |
| GO:0044271 | cellular nitrogen compound<br>biosynthetic process                           | 32 | 230 | 0.14 | 9  | 23 |
| GO:0006631 | fatty acid metabolic process                                                 | 7  | 28  | 0.25 | 1  | 6  |
| GO:0051536 | iron-sulfur cluster binding                                                  | 7  | 28  | 0.25 | 5  | 2  |
| GO:0051540 | metal cluster binding                                                        | 7  | 28  | 0.25 | 5  | 2  |
| GO:0006766 | vitamin metabolic process                                                    | 12 | 61  | 0.20 | 2  | 10 |
| GO:0006767 | water-soluble vitamin<br>metabolic process                                   | 12 | 61  | 0.20 | 2  | 10 |
| GO:0022891 | substrate-specific<br>transmembrane transporter<br>activity                  | 24 | 159 | 0.15 | 15 | 9  |
| GO:0042221 | response to chemical                                                         | 8  | 35  | 0.23 | 5  | 3  |
| GO:1901575 | organic substance catabolic<br>process                                       | 38 | 287 | 0.13 | 11 | 27 |
| GO:0050661 | NADP binding                                                                 | 6  | 22  | 0.27 | 1  | 5  |
| GO:0016903 | oxidoreductase activity,<br>acting on the aldehyde or<br>oxo group of donors | 6  | 22  | 0.27 | 3  | 3  |
| GO:0006163 | purine nucleotide metabolic<br>process                                       | 24 | 163 | 0.15 | 11 | 13 |
| GO:0072521 | purine-containing compound<br>metabolic process                              | 31 | 225 | 0.14 | 14 | 17 |
| GO:0019878 | lysine biosynthetic process<br>via aminoadipic acid                          | 3  | 6   | 0.50 | 0  | 3  |
| GO:0045239 | tricarboxylic acid cycle<br>enzyme complex                                   | 3  | 6   | 0.50 | 3  | 0  |
| GO:0051087 | chaperone binding                                                            | 3  | 6   | 0.50 | 3  | 0  |
| GO:1901681 | sulfur compound binding                                                      | 3  | 6   | 0.50 | 2  | 1  |

|            |                                                                                                       |     |      |      |    |    |
|------------|-------------------------------------------------------------------------------------------------------|-----|------|------|----|----|
| GO:1901700 | response to oxygen-containing compound                                                                | 4   | 11   | 0.36 | 2  | 2  |
| GO:0009085 | lysine biosynthetic process                                                                           | 4   | 11   | 0.36 | 0  | 4  |
| GO:0010035 | response to inorganic substance                                                                       | 4   | 11   | 0.36 | 2  | 2  |
| GO:0006694 | steroid biosynthetic process                                                                          | 5   | 17   | 0.29 | 0  | 5  |
| GO:0016620 | oxidoreductase activity, acting on the aldehyde or oxo group of donors, NAD or NADP as acceptor       | 5   | 17   | 0.29 | 2  | 3  |
| GO:0006807 | nitrogen compound metabolic process                                                                   | 115 | 1071 | 0.11 | 47 | 68 |
| GO:0016835 | carbon-oxygen lyase activity                                                                          | 6   | 24   | 0.25 | 4  | 2  |
| GO:0005759 | mitochondrial matrix                                                                                  | 6   | 24   | 0.25 | 6  | 0  |
| GO:0009165 | nucleotide biosynthetic process                                                                       | 11  | 58   | 0.19 | 3  | 8  |
| GO:0034599 | cellular response to oxidative stress                                                                 | 5   | 18   | 0.28 | 3  | 2  |
| GO:0008202 | steroid metabolic process                                                                             | 5   | 18   | 0.28 | 0  | 5  |
| GO:1901293 | nucleoside phosphate biosynthetic process                                                             | 11  | 60   | 0.18 | 3  | 8  |
| GO:0031072 | heat shock protein binding                                                                            | 3   | 7    | 0.43 | 3  | 0  |
| GO:0044272 | sulfur compound biosynthetic process                                                                  | 8   | 39   | 0.21 | 2  | 6  |
| GO:0009259 | ribonucleotide metabolic process                                                                      | 24  | 170  | 0.14 | 11 | 13 |
| GO:0008643 | carbohydrate transport                                                                                | 6   | 25   | 0.24 | 4  | 2  |
| GO:0005739 | mitochondrion                                                                                         | 16  | 101  | 0.16 | 11 | 5  |
| GO:0019693 | ribose phosphate metabolic process                                                                    | 24  | 172  | 0.14 | 11 | 13 |
| GO:0016829 | lyase activity                                                                                        | 11  | 62   | 0.18 | 7  | 4  |
| GO:0072528 | pyrimidine-containing compound biosynthetic process                                                   | 5   | 19   | 0.26 | 1  | 4  |
| GO:0006551 | leucine metabolic process                                                                             | 5   | 19   | 0.26 | 0  | 5  |
| GO:0016310 | phosphorylation                                                                                       | 27  | 200  | 0.14 | 13 | 14 |
| GO:0009266 | response to temperature stimulus                                                                      | 2   | 3    | 0.67 | 2  | 0  |
| GO:0016635 | oxidoreductase activity, acting on the CH-CH group of donors, quinone or related compound as acceptor | 2   | 3    | 0.67 | 1  | 1  |
| GO:0060590 | ATPase regulator activity                                                                             | 2   | 3    | 0.67 | 2  | 0  |
| GO:0004888 | transmembrane signaling                                                                               | 2   | 3    | 0.67 | 2  | 0  |

|            |                                                          |    |     |      |    |    |
|------------|----------------------------------------------------------|----|-----|------|----|----|
|            | receptor activity                                        |    |     |      |    |    |
| GO:0003984 | acetolactate synthase activity                           | 2  | 3   | 0.67 | 0  | 2  |
| GO:0045252 | oxoglutarate dehydrogenase complex                       | 2  | 3   | 0.67 | 2  | 0  |
| GO:0004096 | catalase activity                                        | 2  | 3   | 0.67 | 0  | 2  |
| GO:0003994 | aconitate hydratase activity                             | 2  | 3   | 0.67 | 2  | 0  |
| GO:0045281 | succinate dehydrogenase complex                          | 2  | 3   | 0.67 | 2  | 0  |
| GO:0045240 | dihydrolipoyl dehydrogenase complex                      | 2  | 3   | 0.67 | 2  | 0  |
| GO:0042744 | hydrogen peroxide catabolic process                      | 2  | 3   | 0.67 | 0  | 2  |
| GO:0009408 | response to heat                                         | 2  | 3   | 0.67 | 2  | 0  |
| GO:0009083 | branched-chain amino acid catabolic process              | 2  | 3   | 0.67 | 0  | 2  |
| GO:0000104 | succinate dehydrogenase activity                         | 2  | 3   | 0.67 | 2  | 0  |
| GO:0008612 | peptidyl-lysine modification to peptidyl-hypusine        | 2  | 3   | 0.67 | 0  | 2  |
| GO:0005750 | mitochondrial respiratory chain complex III              | 2  | 3   | 0.67 | 2  | 0  |
| GO:0004488 | methylenetetrahydrofolate dehydrogenase (NADP+) activity | 2  | 3   | 0.67 | 0  | 2  |
| GO:0006097 | glyoxylate cycle                                         | 2  | 3   | 0.67 | 2  | 0  |
| GO:0006552 | leucine catabolic process                                | 2  | 3   | 0.67 | 0  | 2  |
| GO:0005948 | acetolactate synthase complex                            | 2  | 3   | 0.67 | 0  | 2  |
| GO:0016860 | intramolecular oxidoreductase activity                   | 4  | 13  | 0.31 | 1  | 3  |
| GO:0042398 | cellular modified amino acid biosynthetic process        | 7  | 33  | 0.21 | 1  | 6  |
| GO:0070887 | cellular response to chemical stimulus                   | 6  | 26  | 0.23 | 4  | 2  |
| GO:0009150 | purine ribonucleotide metabolic process                  | 23 | 162 | 0.14 | 11 | 12 |
| GO:0005506 | iron ion binding                                         | 7  | 34  | 0.21 | 2  | 5  |
| GO:0009082 | branched-chain amino acid biosynthetic process           | 5  | 20  | 0.25 | 0  | 5  |
| GO:0008204 | ergosterol metabolic process                             | 3  | 8   | 0.38 | 0  | 3  |
| GO:0004659 | prenyltransferase activity                               | 3  | 8   | 0.38 | 0  | 3  |
| GO:0051537 | 2 iron, 2 sulfur cluster binding                         | 3  | 8   | 0.38 | 2  | 1  |

|            |                                                                                      |    |     |      |    |    |
|------------|--------------------------------------------------------------------------------------|----|-----|------|----|----|
| GO:0016776 | phosphotransferase activity,<br>phosphate group as acceptor                          | 3  | 8   | 0.38 | 1  | 2  |
| GO:0016128 | phytosteroid metabolic<br>process                                                    | 3  | 8   | 0.38 | 0  | 3  |
| GO:0016129 | phytosteroid biosynthetic<br>process                                                 | 3  | 8   | 0.38 | 0  | 3  |
| GO:0019842 | vitamin binding                                                                      | 3  | 8   | 0.38 | 2  | 1  |
| GO:0006696 | ergosterol biosynthetic<br>process                                                   | 3  | 8   | 0.38 | 0  | 3  |
| GO:0006189 | 'de novo' IMP biosynthetic<br>process                                                | 3  | 8   | 0.38 | 0  | 3  |
| GO:0006541 | glutamine metabolic process                                                          | 3  | 8   | 0.38 | 0  | 3  |
| GO:0044107 | cellular alcohol metabolic<br>process                                                | 3  | 8   | 0.38 | 0  | 3  |
| GO:0044108 | cellular alcohol biosynthetic<br>process                                             | 3  | 8   | 0.38 | 0  | 3  |
| GO:0019643 | reductive tricarboxylic acid<br>cycle                                                | 4  | 14  | 0.29 | 4  | 0  |
| GO:0015977 | carbon fixation                                                                      | 4  | 14  | 0.29 | 4  | 0  |
| GO:0018130 | heterocycle biosynthetic<br>process                                                  | 29 | 223 | 0.13 | 9  | 20 |
| GO:0022892 | substrate-specific transporter<br>activity                                           | 24 | 177 | 0.14 | 15 | 9  |
| GO:0008238 | exopeptidase activity                                                                | 6  | 28  | 0.21 | 2  | 4  |
| GO:0051082 | unfolded protein binding                                                             | 6  | 28  | 0.21 | 6  | 0  |
| GO:1901617 | organic hydroxy compound<br>biosynthetic process                                     | 5  | 21  | 0.24 | 0  | 5  |
| GO:0006549 | isoleucine metabolic process                                                         | 5  | 21  | 0.24 | 0  | 5  |
| GO:1901137 | carbohydrate derivative<br>biosynthetic process                                      | 12 | 74  | 0.16 | 3  | 9  |
| GO:0006457 | protein folding                                                                      | 9  | 49  | 0.18 | 8  | 1  |
| GO:0046165 | alcohol biosynthetic process                                                         | 4  | 15  | 0.27 | 0  | 4  |
| GO:0004497 | monooxygenase activity                                                               | 4  | 15  | 0.27 | 0  | 4  |
| GO:0008652 | cellular amino acid<br>biosynthetic process                                          | 18 | 126 | 0.14 | 3  | 15 |
| GO:0046040 | IMP metabolic process                                                                | 3  | 9   | 0.33 | 0  | 3  |
| GO:0006730 | one-carbon metabolic<br>process                                                      | 3  | 9   | 0.33 | 1  | 2  |
| GO:0006188 | IMP biosynthetic process                                                             | 3  | 9   | 0.33 | 0  | 3  |
| GO:0016861 | intramolecular<br>oxidoreductase activity,<br>interconverting aldoses and<br>ketoses | 3  | 9   | 0.33 | 0  | 3  |
| GO:0006575 | cellular modified amino acid                                                         | 9  | 50  | 0.18 | 1  | 8  |

|            |                                                                              |    |     |      |    |    |
|------------|------------------------------------------------------------------------------|----|-----|------|----|----|
|            | metabolic process                                                            |    |     |      |    |    |
| GO:0030554 | adenyl nucleotide binding                                                    | 53 | 462 | 0.11 | 30 | 23 |
| GO:0016830 | carbon-carbon lyase activity                                                 | 5  | 22  | 0.23 | 3  | 2  |
| GO:0036094 | small molecule binding                                                       | 78 | 718 | 0.11 | 39 | 39 |
| GO:0006020 | inositol metabolic process                                                   | 2  | 4   | 0.50 | 0  | 2  |
|            | thiamine-containing                                                          |    |     |      |    |    |
| GO:0042724 | compound biosynthetic process                                                | 2  | 4   | 0.50 | 0  | 2  |
| GO:0004448 | isocitrate dehydrogenase activity                                            | 2  | 4   | 0.50 | 2  | 0  |
| GO:0043446 | cellular alkane metabolic process                                            | 2  | 4   | 0.50 | 0  | 2  |
| GO:0006108 | malate metabolic process                                                     | 2  | 4   | 0.50 | 2  | 0  |
| GO:0016615 | malate dehydrogenase activity                                                | 2  | 4   | 0.50 | 2  | 0  |
| GO:0009228 | thiamine biosynthetic process                                                | 2  | 4   | 0.50 | 0  | 2  |
| GO:0015947 | methane metabolic process                                                    | 2  | 4   | 0.50 | 0  | 2  |
| GO:0004784 | superoxide dismutase activity                                                | 2  | 4   | 0.50 | 2  | 0  |
| GO:0042743 | hydrogen peroxide metabolic process                                          | 2  | 4   | 0.50 | 0  | 2  |
|            | oxidoreductase activity,                                                     |    |     |      |    |    |
| GO:0016721 | acting on superoxide radicals as acceptor                                    | 2  | 4   | 0.50 | 2  | 0  |
| GO:0008144 | drug binding                                                                 | 2  | 4   | 0.50 | 0  | 2  |
| GO:0018065 | protein-cofactor linkage                                                     | 2  | 4   | 0.50 | 2  | 0  |
| GO:0016114 | terpenoid biosynthetic process                                               | 2  | 4   | 0.50 | 0  | 2  |
|            | misfolded or incompletely synthesized protein catabolic process              |    |     |      |    |    |
| GO:0006515 | synthesized protein catabolic process                                        | 2  | 4   | 0.50 | 2  | 0  |
| GO:0006721 | terpenoid metabolic process                                                  | 2  | 4   | 0.50 | 0  | 2  |
| GO:0008121 | ubiquinol-cytochrome-c reductase activity                                    | 2  | 4   | 0.50 | 2  | 0  |
|            | oxidoreductase activity,                                                     |    |     |      |    |    |
| GO:0016681 | acting on diphenols and related substances as donors, cytochrome as acceptor | 2  | 4   | 0.50 | 2  | 0  |
|            | oxidoreductase activity,                                                     |    |     |      |    |    |
| GO:0016679 | acting on diphenols and related substances as donors                         | 2  | 4   | 0.50 | 2  | 0  |
| GO:0009071 | serine family amino acid catabolic process                                   | 2  | 4   | 0.50 | 0  | 2  |

|            |                                        |    |     |      |    |    |
|------------|----------------------------------------|----|-----|------|----|----|
| GO:0070301 | cellular response to hydrogen peroxide | 2  | 4   | 0.50 | 0  | 2  |
| GO:0006546 | glycine catabolic process              | 2  | 4   | 0.50 | 0  | 2  |
| GO:0006563 | L-serine metabolic process             | 6  | 30  | 0.20 | 1  | 5  |
| GO:0043603 | cellular amide metabolic process       | 9  | 52  | 0.17 | 1  | 8  |
| GO:0005737 | cytoplasm                              | 33 | 266 | 0.12 | 8  | 25 |
| GO:0015940 | pantothenate biosynthetic process      | 4  | 16  | 0.25 | 1  | 3  |
| GO:0015939 | pantothenate metabolic process         | 4  | 16  | 0.25 | 1  | 3  |
| GO:0016740 | transferase activity                   | 67 | 607 | 0.11 | 30 | 37 |
| GO:0006950 | response to stress                     | 22 | 164 | 0.13 | 19 | 3  |

Note: Ratio in background represents the ratio of DEGs in the specific GO categories (background genes). Number up or down represent the number of DEG up- or down-regulated in response to the multiple inhibitors stress.

**Table S3 Summary of differentially expressed genes involved in KEGG pathways in multiple inhibitors treated condition.**

| ID      | Term                                                | DEGs | Background genes | DEGs/background genes |
|---------|-----------------------------------------------------|------|------------------|-----------------------|
| ko01220 | Degradation of aromatic compounds                   | 4    | 6                | 0.667                 |
| ko00830 | Retinol metabolism                                  | 3    | 5                | 0.600                 |
| ko00983 | Drug metabolism - other enzymes                     | 4    | 7                | 0.571                 |
| ko00010 | Glycolysis / Gluconeogenesis                        | 25   | 44               | 0.568                 |
| ko00680 | Methane metabolism                                  | 11   | 20               | 0.550                 |
| ko00710 | Carbon fixation in photosynthetic organisms         | 9    | 17               | 0.529                 |
| ko00020 | Citrate cycle (TCA cycle)                           | 14   | 28               | 0.500                 |
| ko00630 | Glyoxylate and dicarboxylate metabolism             | 10   | 20               | 0.500                 |
| ko00130 | Ubiquinone and other terpenoid-quinone biosynthesis | 5    | 10               | 0.500                 |
| ko00625 | Chloroalkane and chloroalkene degradation           | 4    | 8                | 0.500                 |
| ko00626 | Naphthalene degradation                             | 3    | 6                | 0.500                 |
| ko00300 | Lysine biosynthesis                                 | 6    | 13               | 0.462                 |
| ko01200 | Carbon metabolism                                   | 42   | 92               | 0.457                 |
| ko01210 | 2-Oxocarboxylic acid metabolism                     | 15   | 35               | 0.429                 |
| ko00730 | Thiamine metabolism                                 | 3    | 7                | 0.429                 |
| ko04626 | Plant-pathogen interaction                          | 2    | 5                | 0.400                 |
| ko04612 | Antigen processing and presentation                 | 2    | 5                | 0.400                 |
| ko04621 | NOD-like receptor signaling pathway                 | 2    | 5                | 0.400                 |
| ko00950 | Isoquinoline alkaloid biosynthesis                  | 2    | 5                | 0.400                 |
| ko00521 | Streptomycin biosynthesis                           | 2    | 5                | 0.400                 |
| ko00030 | Pentose phosphate pathway                           | 9    | 23               | 0.391                 |
| ko00500 | Starch and sucrose metabolism                       | 12   | 31               | 0.387                 |
| ko00052 | Galactose metabolism                                | 5    | 13               | 0.385                 |
| ko00380 | Tryptophan metabolism                               | 6    | 16               | 0.375                 |
| ko00750 | Vitamin B6 metabolism                               | 3    | 8                | 0.375                 |
| ko00280 | Valine, leucine and isoleucine degradation          | 4    | 11               | 0.364                 |
| ko00650 | Butanoate metabolism                                | 4    | 11               | 0.364                 |
| ko05230 | Central carbon metabolism in cancer                 | 5    | 14               | 0.357                 |
| ko00051 | Fructose and mannose metabolism                     | 6    | 17               | 0.353                 |
| ko00910 | Nitrogen metabolism                                 | 2    | 6                | 0.333                 |
| ko00260 | Glycine, serine and threonine metabolism            | 10   | 32               | 0.313                 |
| ko00670 | One carbon pool by folate                           | 5    | 16               | 0.313                 |
| ko00290 | Valine, leucine and isoleucine biosynthesis         | 4    | 13               | 0.308                 |
| ko00980 | Metabolism of xenobiotics by cytochrome P450        | 3    | 10               | 0.300                 |
| ko00982 | Drug metabolism - cytochrome P450                   | 3    | 10               | 0.300                 |
| ko01230 | Biosynthesis of amino acids                         | 33   | 112              | 0.295                 |
| ko00071 | Fatty acid degradation                              | 5    | 17               | 0.294                 |
| ko00350 | Tyrosine metabolism                                 | 5    | 17               | 0.294                 |
| ko00780 | Biotin metabolism                                   | 2    | 7                | 0.286                 |



|         |                                                        |    |    |       |
|---------|--------------------------------------------------------|----|----|-------|
| ko00620 | Pyruvate metabolism                                    | 11 | 39 | 0.282 |
| ko04152 | AMPK signaling pathway                                 | 7  | 25 | 0.280 |
| ko04066 | HIF-1 signaling pathway                                | 5  | 18 | 0.278 |
| ko00040 | Pentose and glucuronate interconversions               | 3  | 11 | 0.273 |
| ko04260 | Cardiac muscle contraction                             | 5  | 20 | 0.250 |
| ko04068 | FoxO signaling pathway                                 | 4  | 16 | 0.250 |
| ko00770 | Pantothenate and CoA biosynthesis                      | 4  | 16 | 0.250 |
| ko00627 | Aminobenzoate degradation                              | 3  | 12 | 0.250 |
| ko00190 | Oxidative phosphorylation                              | 14 | 58 | 0.241 |
| ko00900 | Terpenoid backbone biosynthesis                        | 4  | 17 | 0.235 |
| ko00740 | Riboflavin metabolism                                  | 3  | 13 | 0.231 |
| ko00360 | Phenylalanine metabolism                               | 3  | 13 | 0.231 |
| ko00960 | Tropane, piperidine and pyridine alkaloid biosynthesis | 2  | 9  | 0.222 |
| ko03320 | PPAR signaling pathway                                 | 2  | 9  | 0.222 |
| ko00250 | Alanine, aspartate and glutamate metabolism            | 5  | 24 | 0.208 |
| ko02020 | Two-component system                                   | 3  | 15 | 0.200 |
| ko00410 | beta-Alanine metabolism                                | 3  | 15 | 0.200 |
| ko00100 | Steroid biosynthesis                                   | 3  | 15 | 0.200 |
| ko04727 | GABAergic synapse                                      | 2  | 10 | 0.200 |
| ko00903 | Limonene and pinene degradation                        | 1  | 5  | 0.200 |
| ko00860 | Porphyrin and chlorophyll metabolism                   | 3  | 16 | 0.188 |
| ko00310 | Lysine degradation                                     | 3  | 16 | 0.188 |
| ko00720 | Carbon fixation pathways in prokaryotes                | 2  | 11 | 0.182 |
| ko04915 | Estrogen signaling pathway                             | 2  | 11 | 0.182 |
| ko04146 | Peroxisome                                             | 7  | 39 | 0.179 |
| ko04910 | Insulin signaling pathway                              | 4  | 23 | 0.174 |
| ko00561 | Glycerolipid metabolism                                | 4  | 23 | 0.174 |
| ko00270 | Cysteine and methionine metabolism                     | 6  | 36 | 0.167 |
| ko04622 | RIG-I-like receptor signaling pathway                  | 1  | 6  | 0.167 |
| ko00520 | Amino sugar and nucleotide sugar metabolism            | 4  | 25 | 0.160 |
| ko00230 | Purine metabolism                                      | 13 | 87 | 0.149 |
| ko03010 | Ribosome                                               | 11 | 76 | 0.145 |
| ko00480 | Glutathione metabolism                                 | 3  | 21 | 0.143 |
| ko00061 | Fatty acid biosynthesis                                | 1  | 7  | 0.143 |
| ko04920 | Adipocytokine signaling pathway                        | 1  | 7  | 0.143 |
| ko00460 | Cyanoamino acid metabolism                             | 1  | 7  | 0.143 |
| ko00330 | Arginine and proline metabolism                        | 5  | 36 | 0.139 |
| ko03430 | Mismatch repair                                        | 3  | 22 | 0.136 |
| ko00640 | Propanoate metabolism                                  | 2  | 16 | 0.125 |
| ko00600 | Sphingolipid metabolism                                | 2  | 16 | 0.125 |
| ko04122 | Sulfur relay system                                    | 1  | 8  | 0.125 |
| ko04918 | Thyroid hormone synthesis                              | 1  | 8  | 0.125 |
| ko04140 | Regulation of autophagy                                | 2  | 17 | 0.118 |
| ko04142 | Lysosome                                               | 2  | 17 | 0.118 |

|         |                                                     |   |     |       |
|---------|-----------------------------------------------------|---|-----|-------|
| ko04071 | Sphingolipid signaling pathway                      | 2 | 17  | 0.118 |
| ko00790 | Folate biosynthesis                                 | 1 | 9   | 0.111 |
| ko03450 | Non-homologous end-joining                          | 1 | 9   | 0.111 |
| ko00450 | Selenocompound metabolism                           | 1 | 9   | 0.111 |
| ko04151 | PI3K-Akt signaling pathway                          | 2 | 20  | 0.100 |
| ko01212 | Fatty acid metabolism                               | 2 | 21  | 0.095 |
| ko04020 | Calcium signaling pathway                           | 1 | 11  | 0.091 |
| ko01040 | Biosynthesis of unsaturated fatty acids             | 1 | 12  | 0.083 |
| ko00514 | Other types of O-glycan biosynthesis                | 1 | 12  | 0.083 |
| ko04022 | cGMP-PKG signaling pathway                          | 1 | 12  | 0.083 |
| ko04966 | Collecting duct acid secretion                      | 1 | 12  | 0.083 |
| ko00340 | Histidine metabolism                                | 1 | 12  | 0.083 |
| ko03018 | RNA degradation                                     | 4 | 49  | 0.082 |
| ko04141 | Protein processing in endoplasmic reticulum         | 6 | 76  | 0.079 |
| ko00920 | Sulfur metabolism                                   | 1 | 13  | 0.077 |
| ko04666 | Fc gamma R-mediated phagocytosis                    | 1 | 13  | 0.077 |
| ko00562 | Inositol phosphate metabolism                       | 1 | 13  | 0.077 |
| ko04144 | Endocytosis                                         | 3 | 40  | 0.075 |
| ko04113 | Meiosis - yeast                                     | 7 | 99  | 0.071 |
| ko03040 | Spliceosome                                         | 4 | 63  | 0.063 |
| ko00760 | Nicotinate and nicotinamide metabolism              | 1 | 16  | 0.063 |
| ko03022 | Basal transcription factors                         | 2 | 32  | 0.063 |
| ko00564 | Glycerophospholipid metabolism                      | 2 | 33  | 0.061 |
| ko03440 | Homologous recombination                            | 1 | 18  | 0.056 |
| ko03460 | Fanconi anemia pathway                              | 1 | 18  | 0.056 |
| ko04810 | Regulation of actin cytoskeleton                    | 1 | 18  | 0.056 |
| ko03060 | Protein export                                      | 1 | 18  | 0.056 |
| ko04010 | MAPK signaling pathway                              | 1 | 18  | 0.056 |
| ko00400 | Phenylalanine, tyrosine and tryptophan biosynthesis | 1 | 19  | 0.053 |
| ko04921 | Oxytocin signaling pathway                          | 1 | 19  | 0.053 |
| ko04914 | Progesterone-mediated oocyte maturation             | 1 | 19  | 0.053 |
| ko04721 | Synaptic vesicle cycle                              | 1 | 22  | 0.045 |
| ko00240 | Pyrimidine metabolism                               | 3 | 68  | 0.044 |
| ko00513 | Various types of N-glycan biosynthesis              | 1 | 32  | 0.031 |
| ko04145 | Phagosome                                           | 1 | 32  | 0.031 |
| ko03420 | Nucleotide excision repair                          | 1 | 36  | 0.028 |
| ko04111 | Cell cycle - yeast                                  | 3 | 110 | 0.027 |
| ko04011 | MAPK signaling pathway - yeast                      | 1 | 37  | 0.027 |
| ko00970 | Aminoacyl-tRNA biosynthesis                         | 1 | 38  | 0.026 |
| ko03013 | RNA transport                                       | 1 | 79  | 0.013 |

Note: The ratio of DEGs/background genes indicates the effects of the DEGs in the specific KEGG pathway (background genes).

**Table S4 Primers used in this study.**

| ID         | Gene         | NR_Description                                                | Primer  | Sequence (5'→3')           |
|------------|--------------|---------------------------------------------------------------|---------|----------------------------|
| KMAR_10772 |              | uncharacterized abhydrolase domain-containing protein YGR015C | Forward | CCCTTGTGAAATCTTGCGTAAAGTTG |
|            |              |                                                               | Reverse | AATGTAGCATACCGTCGCATAGTTG  |
| KMAR_80057 | <i>RPB1</i>  | DNA-directed RNA polymerase II subunit RPB1                   | Forward | CCGTGGTAACACTCCATTCTCAAG   |
|            |              |                                                               | Reverse | GAGCAGAGGTAGCGTTGTAAGTTG   |
| KMAR_50053 | <i>IRC8</i>  | uncharacterized protein IRC8                                  | Forward | GCAACAGAAACTCACCACAAAG     |
|            |              |                                                               | Reverse | TCCCTTCCCGCACCGAAAC        |
| KMAR_10795 | <i>NQO2</i>  | ribosyldihyronicotinamide dehydrogenase                       | Forward | GCACCCAGAATTAAGTGATCCAGAAG |
|            |              |                                                               | Reverse | ACATTCAAACCCGAGTAACCGAAAG  |
| KMAR_80139 |              | carbonic anhydrase                                            | Forward | TGAAGGTGAACAAAGTCGTCATCTG  |
|            |              |                                                               | Reverse | TCGTCGAGGTCCTGGAGGTAG      |
| KMAR_50521 | <i>SDH4</i>  | succinate dehydrogenase                                       | Forward | CCACTCTCGCTTCCGTCCTATTG    |
|            |              |                                                               | Reverse | CCCATGATACCACCTTCCTTTGTTTC |
| KMAR_10054 | <i>HBN1</i>  | putative nitroreductase HBN1                                  | Forward | GGCTTCTGTTACCGATGCTGTTG    |
|            |              |                                                               | Reverse | TGGATTGGTCTGCGAAGGATGG     |
| KMAR_20313 | <i>MCH5</i>  | riboflavin transporter MCH5                                   | Forward | ACACTCTTAACCTTCGTCAT       |
|            |              |                                                               | Reverse | GGCACCAGATATAGGAACT        |
| KMAR_70277 | <i>CTR1</i>  | copper transport protein CTR1                                 | Forward | CCGTCTCTAATCACATTCCG       |
|            |              |                                                               | Reverse | CCATCGTCATCTTCATAGGA       |
| KMAR_40093 | <i>ARN2</i>  | siderophore iron transporter ARN2                             | Forward | TTCAGAAGCGGTAAGGATT        |
|            |              |                                                               | Reverse | CGAGGTGATGGATTGGAT         |
| KMAR_10790 | <i>SIT1</i>  | major facilitator superfamily                                 | Forward | CTATCTGGACCTCTGAACTT       |
|            |              |                                                               | Reverse | AATAGAACTGACACCAACAC       |
| KMAR_30337 | <i>PDR12</i> | ATP-dependent permease PDR12                                  | Forward | CTGCCTACTTCGTGCTTA         |
|            |              |                                                               | Reverse | CACAGAACAACAACATACCA       |
| KMAR_80266 | <i>ITR2</i>  | myo-inositol transporter 2                                    | Forward | CTTCTGCTACTTGTGTTATCC      |
|            |              |                                                               | Reverse | TCTCTTCTGGCTAGTTGTT        |
| KMAR_20248 | <i>JEN2</i>  | putative sialic acid transporter                              | Forward | GTGCTTCCTCTACGATTGA        |
|            |              |                                                               | Reverse | CAGGTCTAGAAATGGTAATGA      |
| KMAR_60075 | <i>JEN1</i>  | carboxylic acid transporter protein homolog                   | Forward | AAGAAGGATTACGCTAAGGT       |
|            |              |                                                               | Reverse | GAGATGGATAGACTGGAGAC       |
| KMAR_50130 | <i>FNX1</i>  | multidrug resistance protein fnx1                             | Forward | CGGTCTAATGGCAATAGGA        |
|            |              |                                                               | Reverse | AGCGAGAAGAGTAACAGTAA       |
| KMAR_70043 | <i>ACT1</i>  | Actin                                                         | Forward | TTGGCTGGTAGAGACATCACTGAC   |
|            |              |                                                               | Reverse | AGCAGATGATTGAGAAGCGGTTTG   |
